# Supplementary material for: DNA-PKcs modulates progenitor cell proliferation and fibroblast senescence in idiopathic pulmonary fibrosis
Source: Springer Nature journal article supplement (doi:10.1186/s12890-019-0922-7), 2019-08-29

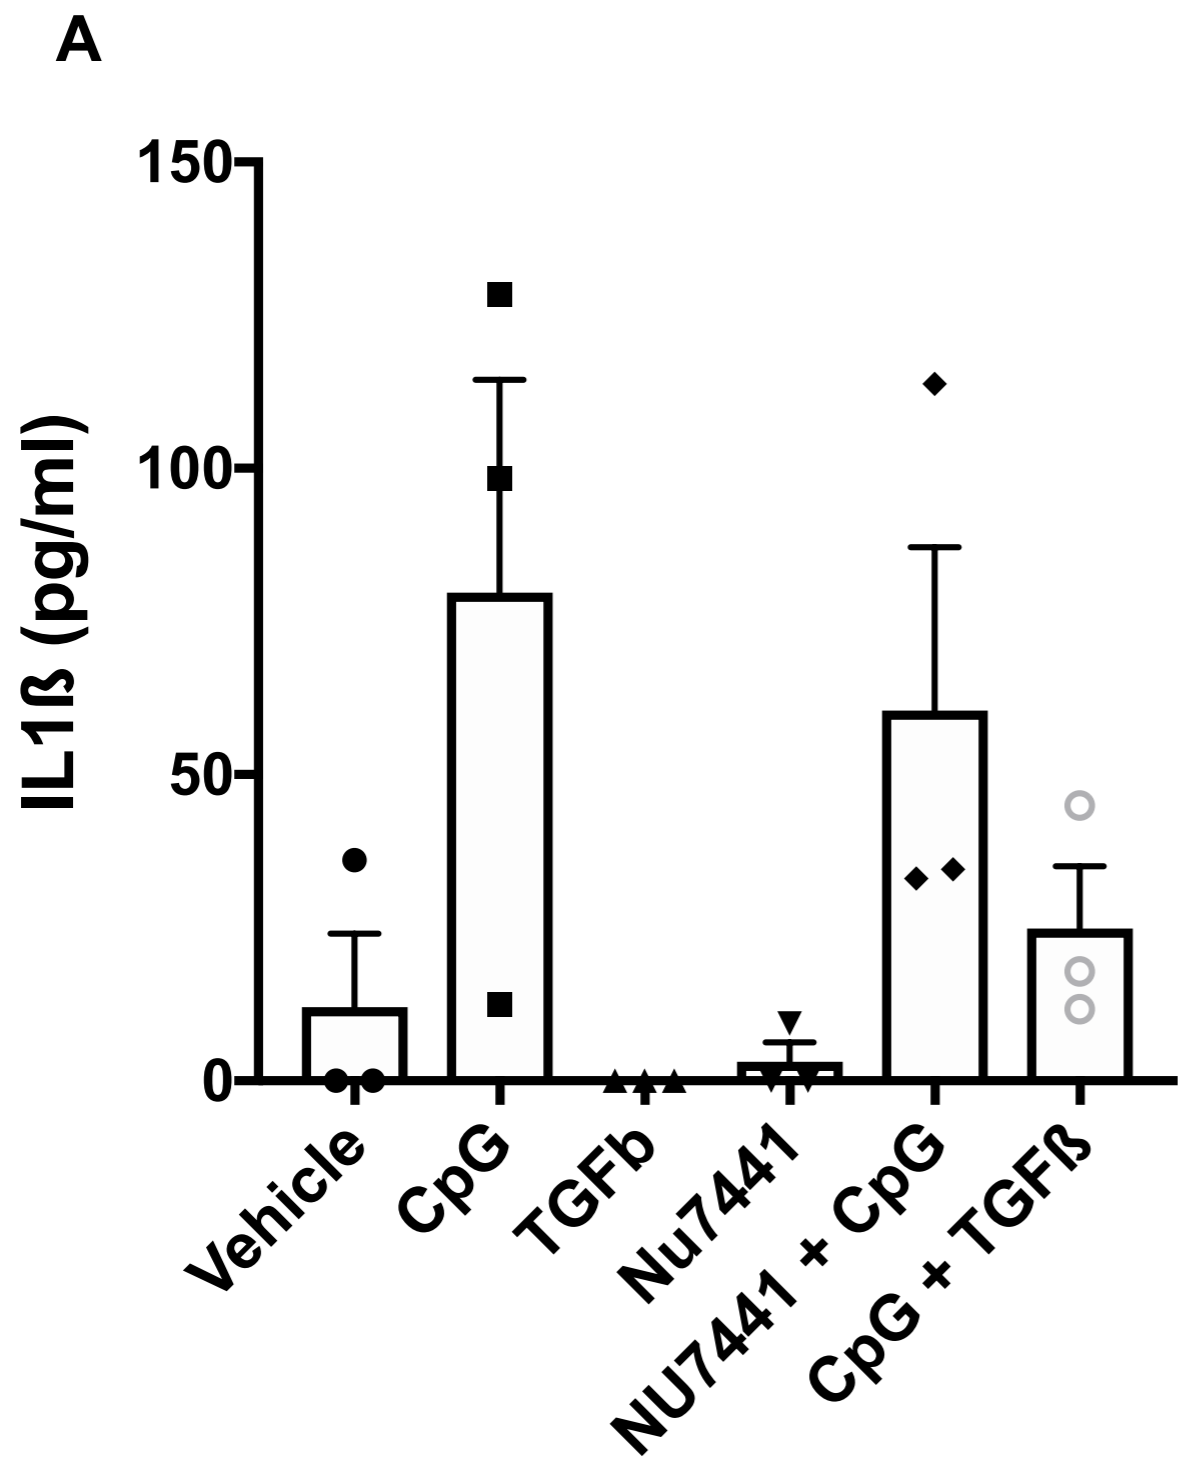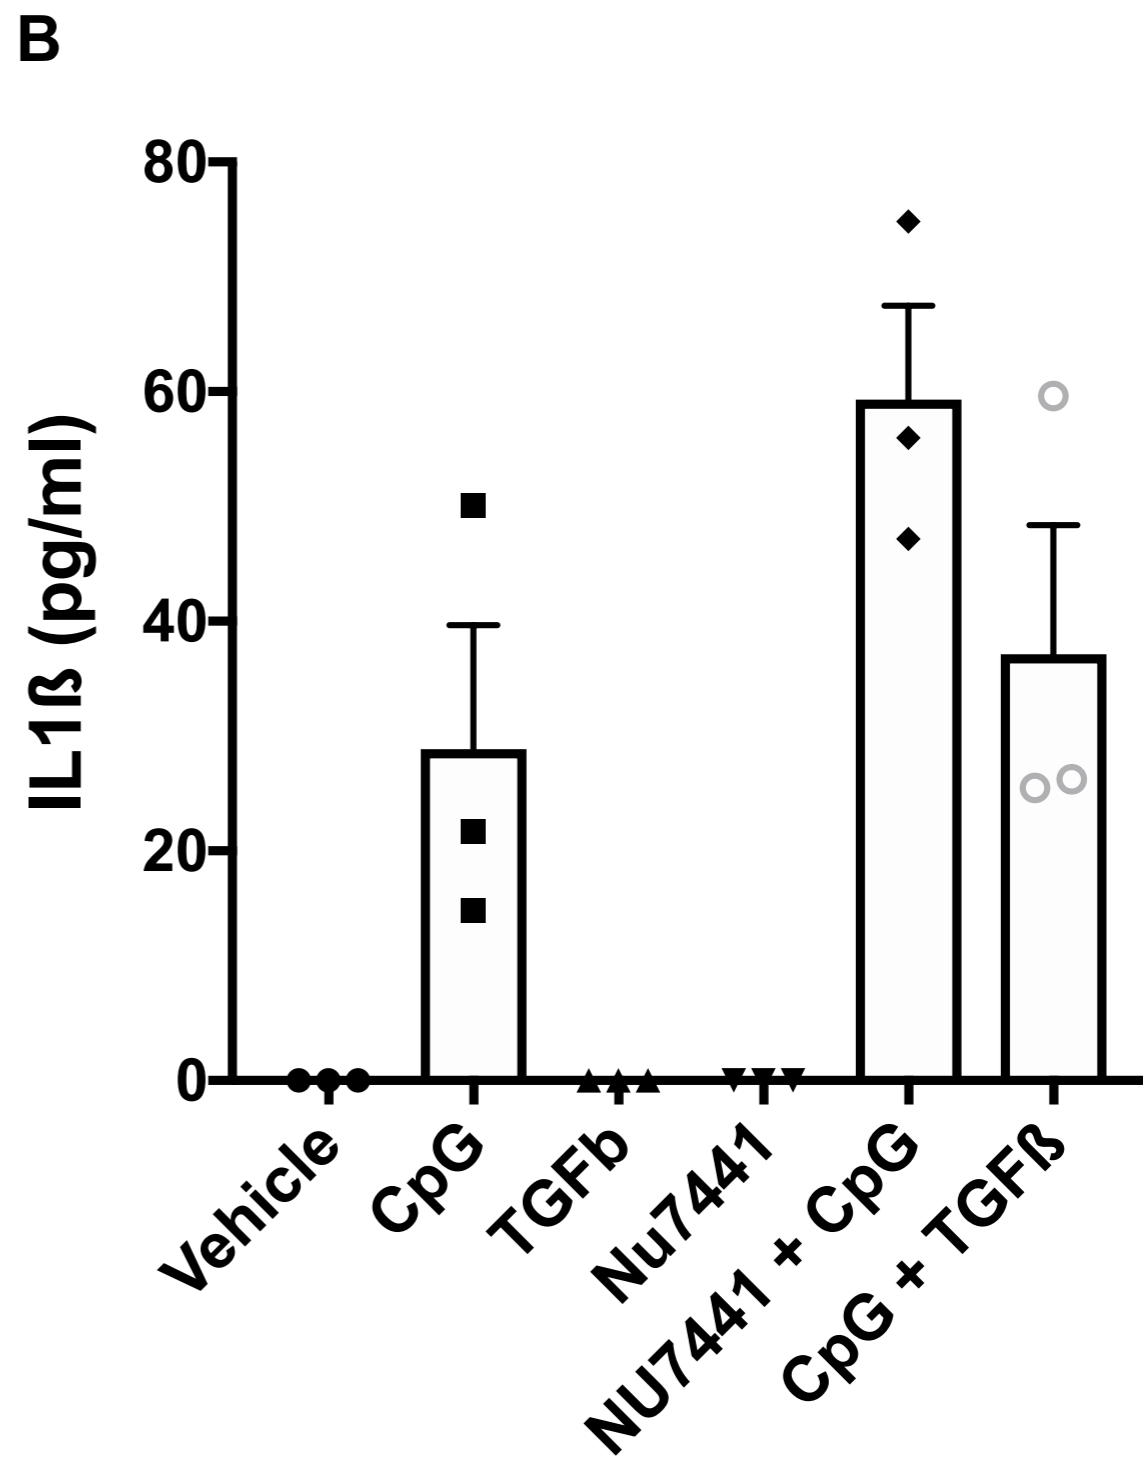

Supplement: MOESM1 [file 17117052]
