# Supplementary material for: DNA-PKcs modulates progenitor cell proliferation and fibroblast senescence in idiopathic pulmonary fibrosis
Source: Springer Nature journal article supplement (doi:10.1186/s12890-019-0922-7), 2019-08-29
Supplement: MOESM3 [file 17117052]

**A**

### Slow IPF vs normal SSEA4+

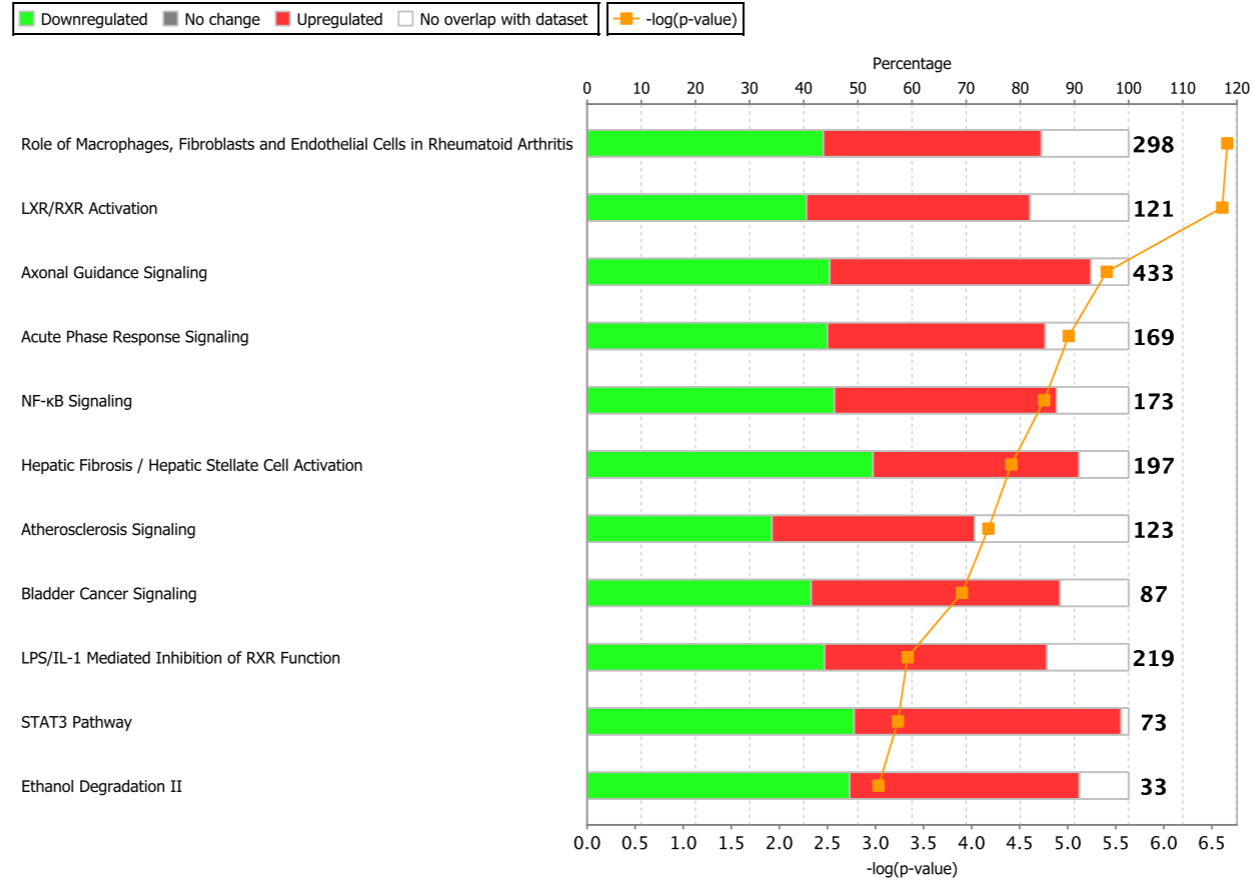

© 2000–2018 QIAGEN. All rights reserved.

**B**

### Slow IPF vs normal SSEA4-

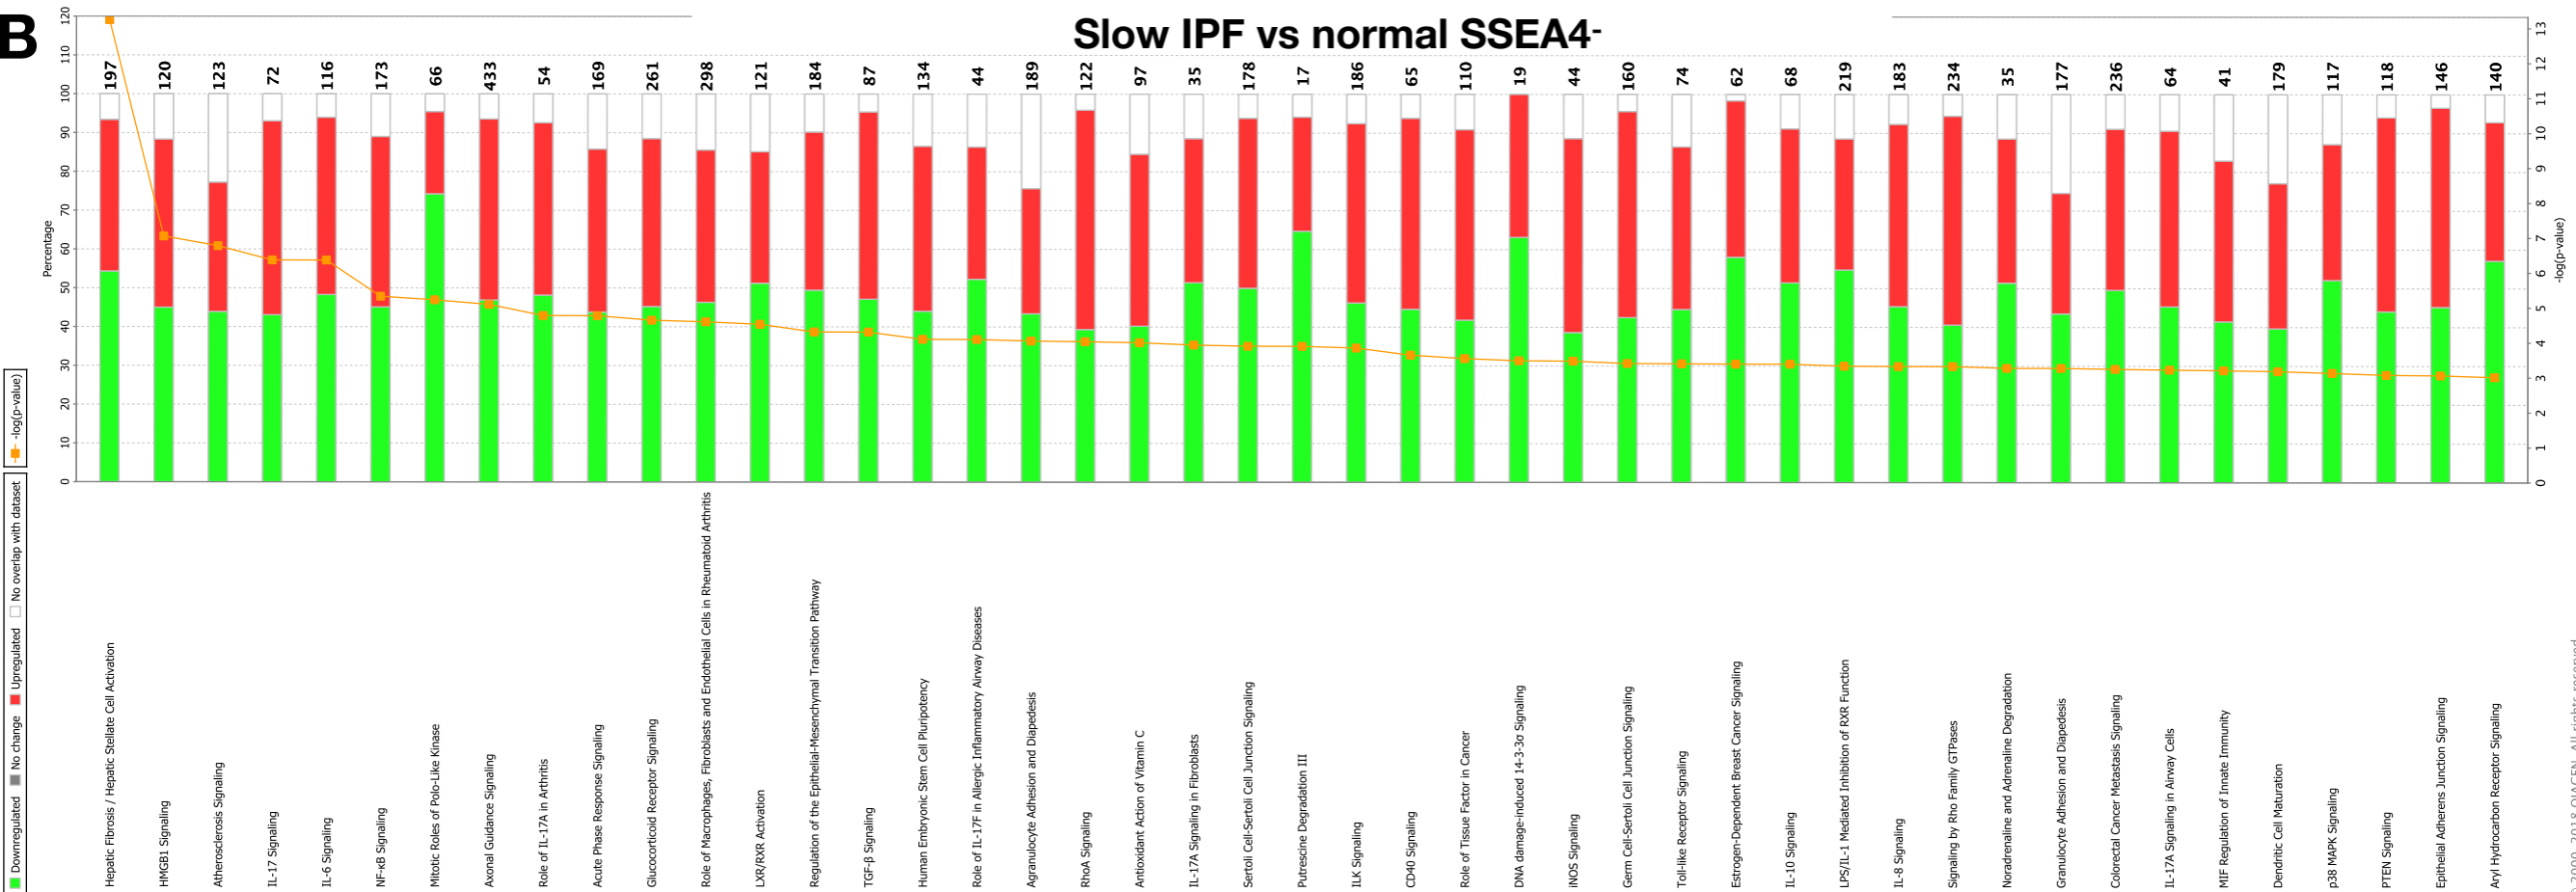

© 2000–2018 QIAGEN. All rights reserved.
